# Supplementary material for: Synthesis and interconversions of digold(i), tetragold(i), digold(ii), gold(i)–gold(iii) and digold(iii) complexes of fluorine-substituted aryl carbanions
Source: Royal Society of Chemistry journal article supplement (doi:10.1039/b906769h), 2009-01-01
Supplement: b906769h.pdf [file b906769h.pdf]

**Synthesis and interconversions of digold(I), tetragold(I), digold(II), gold(I)-gold(III) and digold(III) complexes of fluorine-substituted aryl carbanions.**

**Martin A. Bennett<sup>a</sup>, Suresh K. Bhargava<sup>b</sup>, Nedaossadat Mirzadeh<sup>b</sup>, Steven H. Privér<sup>b</sup>, Jörg Wagler<sup>a</sup> and Anthony C. Willis.<sup>a</sup>**

<sup>a</sup> Research School of Chemistry, Australian National University, Canberra, ACT 0200, Australia.

<sup>b</sup> School of Applied Sciences (Applied Chemistry), RMIT University, GPO Box 2476V, Melbourne, Victoria 3001, Australia.

**Table S1. Analytical data for gold complexes of 2-C<sub>6</sub>F<sub>4</sub>PPh<sub>2</sub> and C<sub>6</sub>H<sub>3</sub>-*n*-F-2-PPh<sub>2</sub> (*n* = 5, 6).<sup>a</sup>**

| Compound                                                                                                                                                      | C            | H          | P          | F            | X            |
|---------------------------------------------------------------------------------------------------------------------------------------------------------------|--------------|------------|------------|--------------|--------------|
| [Au <sub>2</sub> (μ-2-C <sub>6</sub> F <sub>4</sub> PPh <sub>2</sub> ) <sub>2</sub> ] <b>2</b>                                                                | 40.58(40.78) | 2.05(1.90) | 5.69(5.84) |              |              |
| [Au <sub>2</sub> (μ-C <sub>6</sub> H <sub>3</sub> -5-F-2-PPh <sub>2</sub> ) <sub>2</sub> ] <b>3</b>                                                           | 45.28(45.40) | 2.78(2.75) |            | 3.57(3.99)   |              |
| [Au <sub>2</sub> (μ-C <sub>6</sub> H <sub>3</sub> -6-F-2-PPh <sub>2</sub> ) <sub>2</sub> ] <b>4</b>                                                           | 44.93(45.40) | 2.81(2.75) | 6.45(6.50) | 3.74(3.99)   |              |
| [Au <sub>2</sub> X <sub>2</sub> (μ-2-C <sub>6</sub> F <sub>4</sub> PPh <sub>2</sub> ) <sub>2</sub> ] <b>5</b>                                                 | 38.23(38.22) | 2.06(1.78) | 5.67(5.48) |              |              |
| [Au <sub>2</sub> X <sub>2</sub> (μ-C <sub>6</sub> H <sub>3</sub> -5-F-2-PPh <sub>2</sub> ) <sub>2</sub> ] <b>6</b>                                            | 43.07(42.25) | 3.07(2.56) |            | 3.22(3.71)   | 6.67(6.93)   |
| [Au <sub>2</sub> X <sub>2</sub> (μ-C <sub>6</sub> H <sub>3</sub> -6-F-2-PPh <sub>2</sub> ) <sub>2</sub> ] <b>7</b>                                            | 43.79(42.25) | 2.92(2.56) |            | 3.18(3.71)   | 7.11(6.93)   |
| [Au <sub>2</sub> X <sub>2</sub> (μ-2-C <sub>6</sub> F <sub>4</sub> PPh <sub>2</sub> ) <sub>2</sub> ] <b>8</b>                                                 | 35.30(35.44) | 1.68(1.65) | 5.01(5.08) |              |              |
| [Au <sub>2</sub> X <sub>2</sub> (μ-C <sub>6</sub> H <sub>3</sub> -5-F-2-PPh <sub>2</sub> ) <sub>2</sub> ] <b>9</b>                                            | 39.48(38.87) | 2.57(2.36) |            | 3.52(3.42)   | 13.46(14.37) |
| [Au <sub>2</sub> X <sub>2</sub> (μ-C <sub>6</sub> H <sub>3</sub> -6-F-2-PPh <sub>2</sub> ) <sub>2</sub> ] <b>10</b>                                           | 39.59(38.87) | 2.66(2.36) |            | 3.41(3.42)   | 14.10(14.37) |
| [Au <sub>2</sub> X <sub>2</sub> (μ-C <sub>6</sub> H <sub>3</sub> -5-F-2-PPh <sub>2</sub> ) <sub>2</sub> ] <b>12</b>                                           | 36.14(35.85) | 2.27(2.17) |            | 2.91(3.15)   | 21.11(21.04) |
| [Au <sub>2</sub> X <sub>2</sub> (μ-C <sub>6</sub> H <sub>3</sub> -6-F-2-PPh <sub>2</sub> ) <sub>2</sub> ] <b>13</b>                                           | 36.25(35.85) | 2.56(2.17) |            | 2.90(3.15)   | 21.25(21.04) |
| [Au <sub>2</sub> (OAc) <sub>2</sub> (μ-2-C <sub>6</sub> F <sub>4</sub> PPh <sub>2</sub> ) <sub>2</sub> ] <b>14</b>                                            | 42.51(40.77) | 2.90(2.22) | 5.31(5.26) |              |              |
| [Au <sub>2</sub> (ONO <sub>2</sub> ) <sub>2</sub> (μ-2-C <sub>6</sub> F <sub>4</sub> PPh <sub>2</sub> ) <sub>2</sub> ] <b>15</b>                              | 36.71(35.61) | 1.86(1.70) | 4.94(5.23) |              | 2.34(2.37)   |
| [Au <sub>2</sub> (OBz) <sub>2</sub> (μ-2-C <sub>6</sub> F <sub>4</sub> PPh <sub>2</sub> ) <sub>2</sub> ] <b>16</b>                                            | 46.42(46.10) | 3.00(2.32) | 4.71(4.76) |              |              |
| [Au <sup>II</sup> <sub>2</sub> (O <sub>2</sub> CCF <sub>3</sub> ) <sub>2</sub> (μ-2-C <sub>6</sub> F <sub>4</sub> PPh <sub>2</sub> ) <sub>2</sub> ] <b>17</b> | 37.64(37.35) | 1.73(1.57) | 4.77(4.82) |              |              |
| [Au <sup>II</sup> <sub>2</sub> (C <sub>6</sub> F <sub>5</sub> ) <sub>2</sub> (μ-2-C <sub>6</sub> F <sub>4</sub> PPh <sub>2</sub> ) <sub>2</sub> ] <b>18</b>   | 41.58(41.43) | 1.49(1.45) |            | 24.89(24.52) |              |
| [Au <sub>2</sub> <sup>I,III</sup> (CH <sub>3</sub> ) <sub>2</sub> (μ-2-C <sub>6</sub> F <sub>4</sub> PPh <sub>2</sub> ) <sub>2</sub> ] <b>19</b>              | 41.93(41.85) | 2.40(2.40) |            |              |              |
| [Au <sub>4</sub> (μ-2-C <sub>6</sub> F <sub>4</sub> PPh <sub>2</sub> ) <sub>4</sub> ] <b>21</b>                                                               | 39.88(40.78) | 1.96(1.90) | 5.67(5.84) | 14.65(14.33) |              |
| [XAu(μ-2-C <sub>6</sub> F <sub>4</sub> PPh <sub>2</sub> )(κ <sup>2</sup> -2-C <sub>6</sub> F <sub>4</sub> PPh <sub>2</sub> )AuX] <b>25</b>                    | 38.23(38.22) | 1.92(1.78) | 5.71(5.48) |              |              |
| [XAu(μ-2-C <sub>6</sub> F <sub>4</sub> PPh <sub>2</sub> )(κ <sup>2</sup> -2-C <sub>6</sub> F <sub>4</sub> PPh <sub>2</sub> )AuX] <b>26</b>                    | 35.99(35.44) | 2.16(1.65) |            |              |              |
| [XAu(μ-2-C <sub>6</sub> F <sub>4</sub> PPh <sub>2</sub> )(κ <sup>2</sup> -2-C <sub>6</sub> F <sub>4</sub> PPh <sub>2</sub> )AuX] <b>27</b>                    | 33.13(32.90) | 1.83(1.53) |            |              |              |
| [XAu(μ-2-C <sub>6</sub> H <sub>3</sub> -6-F-2-PPh <sub>2</sub> )(κ <sup>2</sup> -C <sub>6</sub> H <sub>3</sub> -6-F-2-PPh <sub>2</sub> )AuX] <b>28</b>        | 42.13(42.25) | 2.77(2.56) | 5.81(6.05) | 3.37(3.71)   | 6.58(6.93)   |
| [Au <sub>2</sub> X <sub>2</sub> (2,2'-Ph <sub>2</sub> P-5-F-C <sub>6</sub> H <sub>3</sub> C <sub>6</sub> H <sub>3</sub> -5-F-PPh <sub>2</sub> )] <b>32</b>    | 41.92(42.25) | 2.67(2.56) |            | 4.04(3.71)   | 6.57(6.93)   |
| [Au <sub>2</sub> X <sub>2</sub> (2,2'-Ph <sub>2</sub> P-5-F-C <sub>6</sub> H <sub>3</sub> C <sub>6</sub> H <sub>3</sub> -5-F-PPh <sub>2</sub> )] <b>33</b>    | 38.35(38.87) | 2.52(2.36) |            | 3.88(3.42)   |              |
| [Au <sub>2</sub> X <sub>2</sub> (2,2'-Ph <sub>2</sub> P-5-F-C <sub>6</sub> H <sub>3</sub> C <sub>6</sub> H <sub>3</sub> -5-F-PPh <sub>2</sub> )] <b>34</b>    | 35.67(38.85) | 2.27(2.17) |            | 2.85(3.15)   |              |
| [BzOAU(μ-2-C <sub>6</sub> F <sub>4</sub> PPh <sub>2</sub> )(κ <sup>2</sup> -2-C <sub>6</sub> F <sub>4</sub> PPh <sub>2</sub> )AuOBz] <b>37</b>                | 46.49(46.10) | 2.71(2.32) | 4.47(4.76) | 11.25(11.67) |              |
| [Au <sub>2</sub> X <sub>4</sub> (μ-2-C <sub>6</sub> F <sub>4</sub> PPh <sub>2</sub> ) <sub>2</sub> ] <b>39</b>                                                | 35.47(35.97) | 1.91(1.68) | 5.43(5.15) | 12.28(12.64) |              |
| [Au <sub>2</sub> X <sub>4</sub> (μ-2-C <sub>6</sub> F <sub>4</sub> PPh <sub>2</sub> ) <sub>2</sub> ] <b>40</b>                                                | 29.22(31.33) | 1.53(1.46) | 4.25(4.49) | 10.24(11.01) |              |
| [X <sub>3</sub> Au(μ-2-C <sub>6</sub> F <sub>4</sub> PPh <sub>2</sub> )(κ <sup>2</sup> -2-C <sub>6</sub> F <sub>4</sub> PPh <sub>2</sub> )AuX] <b>41</b>      | 35.60(35.97) | 1.73(1.68) |            |              | 11.91(11.80) |
| [X <sub>3</sub> Au(μ-2-C <sub>6</sub> F <sub>4</sub> PPh <sub>2</sub> )(κ <sup>2</sup> -2-C <sub>6</sub> F <sub>4</sub> PPh <sub>2</sub> )AuX] <b>42</b>      | 31.83(31.33) | 1.45(1.46) |            |              |              |

<sup>a</sup> Calculated values (%) in parentheses. X = Cl in **6**, **7**, **28**, **32** and **41**; Br in **9** and **10**; I in **12**; N in **15**.

**Table S2. Crystal data and details of data collection and structure refinement for complexes 2 (monoclinic**

| Compound                                                | 2                                                                                     | 5                                                                                                                                            | 8                                                                                                                                            | 25                                                                                                                                                                 |
|---------------------------------------------------------|---------------------------------------------------------------------------------------|----------------------------------------------------------------------------------------------------------------------------------------------|----------------------------------------------------------------------------------------------------------------------------------------------|--------------------------------------------------------------------------------------------------------------------------------------------------------------------|
| Formula                                                 | [Au <sub>2</sub> (μ-2-C <sub>6</sub> F <sub>4</sub> PPh <sub>2</sub> ) <sub>2</sub> ] | 2[Au <sub>2</sub> Cl <sub>2</sub> (μ-2-C <sub>6</sub> F <sub>4</sub> PPh <sub>2</sub> ) <sub>2</sub> ].2.5(CH <sub>2</sub> Cl <sub>2</sub> ) | 2[Au <sub>2</sub> Br <sub>2</sub> (μ-2-C <sub>6</sub> F <sub>4</sub> PPh <sub>2</sub> ) <sub>2</sub> ].2.5(CH <sub>2</sub> Cl <sub>2</sub> ) | [ClAu(μ-2-C <sub>6</sub> F <sub>4</sub> PPh <sub>2</sub> )(κ <sup>2</sup> -2-C <sub>6</sub> F <sub>4</sub> PPh <sub>2</sub> )AuCl].CH <sub>2</sub> Cl <sub>2</sub> |
| fw                                                      | 1067.91                                                                               | 2474.98                                                                                                                                      | 2655.36                                                                                                                                      | 1216.26                                                                                                                                                            |
| Crystal system                                          | Monoclinic                                                                            | Monoclinic                                                                                                                                   | Monoclinic                                                                                                                                   | Orthorhombic                                                                                                                                                       |
| Space group                                             | P2 <sub>1</sub> /n                                                                    | P2 <sub>1</sub> /c                                                                                                                           | P2 <sub>1</sub> /c                                                                                                                           | P2 <sub>1</sub> 2 <sub>1</sub> 2 <sub>1</sub>                                                                                                                      |
| a, Å                                                    | 12.7411(5)                                                                            | 17.2172(1)                                                                                                                                   | 17.4374(1)                                                                                                                                   | 10.1958(1)                                                                                                                                                         |
| b, Å                                                    | 12.9877(6)                                                                            | 21.7718(2)                                                                                                                                   | 21.6957(2)                                                                                                                                   | 16.5651(2)                                                                                                                                                         |
| c, Å                                                    | 19.6902(8)                                                                            | 22.8310(2)                                                                                                                                   | 22.8416(2)                                                                                                                                   | 22.7112(3)                                                                                                                                                         |
| β, deg                                                  | 99.839(2)                                                                             | 111.2521(5)                                                                                                                                  | 109.8587(5)                                                                                                                                  | 90                                                                                                                                                                 |
| V, Å <sup>3</sup>                                       | 3210.4(2)                                                                             | 7976.18(11)                                                                                                                                  | 8127.48(12)                                                                                                                                  | 3835.80 (8)                                                                                                                                                        |
| Z                                                       | 4                                                                                     | 4                                                                                                                                            | 4                                                                                                                                            | 4                                                                                                                                                                  |
| Cryst dimens (mm)                                       | 0.34 × 0.31 × 0.22                                                                    | 0.30 × 0.09 × 0.08                                                                                                                           | 0.40 × 0.18 × 0.08                                                                                                                           | 0.40 × 0.10 × 0.08                                                                                                                                                 |
| D <sub>calc</sub> (Mg m <sup>-3</sup> )                 | 2.209                                                                                 | 2.061                                                                                                                                        | 2.170                                                                                                                                        | 2.106                                                                                                                                                              |
| μ (mm <sup>-1</sup> )                                   | 9.475                                                                                 | 7.796                                                                                                                                        | 9.488                                                                                                                                        | 8.070                                                                                                                                                              |
| T, K                                                    | 200                                                                                   | 200                                                                                                                                          | 200                                                                                                                                          | 200                                                                                                                                                                |
| No. indep rflns (R <sub>int</sub> )                     | 7378 (0.077)                                                                          | 18243 (0.086)                                                                                                                                | 18591 (0.052)                                                                                                                                | 8801 (0.042)                                                                                                                                                       |
| No. obsd rflns [I > 3σ(I)]                              | 4549                                                                                  | 8879                                                                                                                                         | 10971                                                                                                                                        | 7309                                                                                                                                                               |
| No. params refined                                      | 441                                                                                   | 992                                                                                                                                          | 992                                                                                                                                          | 507                                                                                                                                                                |
| R <sub>F</sub>                                          | 0.0429                                                                                | 0.0246                                                                                                                                       | 0.0229                                                                                                                                       | 0.0261                                                                                                                                                             |
| R <sub>w</sub>                                          | 0.0458                                                                                | 0.0287                                                                                                                                       | 0.0269                                                                                                                                       | 0.0302                                                                                                                                                             |
| P <sub>max</sub> /P <sub>min</sub> (e Å <sup>-3</sup> ) | 1.5/-2.92                                                                             | 1.10/-1.15                                                                                                                                   | 1.16/-1.04                                                                                                                                   | 5.22/-2.05                                                                                                                                                         |

and triclinic forms), 4-8, 11, 15-19, 21-22, 24,25, 28, 32, 33, 35, 36, 41 and 42.

| Compound                                         | 2                                                                                     | 4                                                                                          | 6                                                                                                          |
|--------------------------------------------------|---------------------------------------------------------------------------------------|--------------------------------------------------------------------------------------------|------------------------------------------------------------------------------------------------------------|
| Formula                                          | [Au <sub>2</sub> (μ-2-C <sub>6</sub> F <sub>4</sub> PPh <sub>2</sub> ) <sub>2</sub> ] | [Au <sub>2</sub> (μ-C <sub>6</sub> H <sub>3</sub> -6-F-2-PPh <sub>2</sub> ) <sub>2</sub> ] | [Au <sub>2</sub> Cl <sub>2</sub> (μ-C <sub>6</sub> H <sub>3</sub> -5-F-2-PPh <sub>2</sub> ) <sub>2</sub> ] |
| fw                                               | 1060.39                                                                               | 952.44                                                                                     | 1122.07                                                                                                    |
| Crystal system                                   | Triclinic                                                                             | Triclinic                                                                                  | Monoclinic                                                                                                 |
| Space group                                      | P-1                                                                                   | P-1                                                                                        | P2 <sub>1</sub> /c                                                                                         |
| a, Å                                             | 10.7539(2)                                                                            | 9.0115(2)                                                                                  | 16.6877(2)                                                                                                 |
| b, Å                                             | 12.7320(2)                                                                            | 9.5208(2)                                                                                  | 20.0851(3)                                                                                                 |
| c, Å                                             | 12.8969(2)                                                                            | 10.0842(2)                                                                                 | 11.64580(10)                                                                                               |
| α, deg                                           | 90.4600(10)                                                                           | 89.7260(10)                                                                                | 90                                                                                                         |
| β, deg                                           | 113.9920(10)                                                                          | 78.8100(10)                                                                                | 95.7130(10)                                                                                                |
| γ, deg                                           | 98.3480(10)                                                                           | 63.1070(10)                                                                                | 90                                                                                                         |
| V, Å <sup>3</sup>                                | 1591.77(5)                                                                            | 753.54                                                                                     | 3883.98(8)                                                                                                 |
| Z                                                | 2                                                                                     | 1                                                                                          | 4                                                                                                          |
| D <sub>calc</sub> (Mg m <sup>-3</sup> )          | 2.212                                                                                 | 2.099                                                                                      | 1.919                                                                                                      |
| μ (mm <sup>-1</sup> )                            | 9.381                                                                                 | 9.867                                                                                      | 7.846                                                                                                      |
| T, K                                             | 110(2)                                                                                | 100(2)                                                                                     | 100(2)                                                                                                     |
| Cryst dimens (mm)                                | 0.11 × 0.06 × 0.06                                                                    | 0.22 × 0.20 × 0.10                                                                         | 0.34 × 0.30 × 0.17                                                                                         |
| Theta range, deg                                 | 2.78-28.00                                                                            | 2.60-40.00                                                                                 | 2.65-33.00                                                                                                 |
| Reflections collected                            | 53442                                                                                 | 33955                                                                                      | 80609                                                                                                      |
| unique (R <sub>int</sub> )                       | 7679(0.0644)                                                                          | 9335 (0.0637)                                                                              | 14619 (0.0834)                                                                                             |
| Data / Restraints / Parameters                   | 7679 / 0 / 433                                                                        | 9335 / 0 / 191                                                                             | 14619 / 42 / 466                                                                                           |
| Final R indices [I > 2σ(I)]                      | R1 = 0.0240, wR2 = 0.0537                                                             | R1 = 0.0271, wR2 = 0.0650                                                                  | R1 = 0.0402, wR2 = 0.1046                                                                                  |
| R indices (all data)                             | R1 = 0.0470, wR2 = 0.0591                                                             | R1 = 0.0315, wR2 = 0.0663                                                                  | R1 = 0.0542, wR2 = 0.1100                                                                                  |
| Largest diff. peak and hole (e.Å <sup>-3</sup> ) | 2.028, -1.030                                                                         | 3.972, -3.023                                                                              | 4.666, -4.155                                                                                              |

| Compound                                         | 7                                                                                                          | 11                                                                                                   | 15                                                                                                                                                     |
|--------------------------------------------------|------------------------------------------------------------------------------------------------------------|------------------------------------------------------------------------------------------------------|--------------------------------------------------------------------------------------------------------------------------------------------------------|
| Formula                                          | [Au <sub>2</sub> Cl <sub>2</sub> (μ-C <sub>6</sub> H <sub>3</sub> -6-F-2-PPh <sub>2</sub> ) <sub>2</sub> ] | [Au <sub>2</sub> I <sub>2</sub> (μ-2-C <sub>6</sub> F <sub>4</sub> PPh <sub>2</sub> ) <sub>2</sub> ] | [Au <sub>2</sub> (ONO <sub>2</sub> ) <sub>2</sub> (μ-2-C <sub>6</sub> F <sub>4</sub> PPh <sub>2</sub> ) <sub>2</sub> ].CH <sub>2</sub> Cl <sub>2</sub> |
| fw                                               | 1083.17                                                                                                    | 1314.19                                                                                              | 1269.34                                                                                                                                                |
| Crystal system                                   | Triclinic                                                                                                  | Monoclinic                                                                                           | Monoclinic                                                                                                                                             |
| Space group                                      | P-1                                                                                                        | P2 <sub>1</sub> /n                                                                                   | P2 <sub>1</sub> /n                                                                                                                                     |
| <i>a</i> , Å                                     | 9.57140(10)                                                                                                | 13.5862(2)                                                                                           | 9.3504(3)                                                                                                                                              |
| <i>b</i> , Å                                     | 19.3795(3)                                                                                                 | 17.8577(3)                                                                                           | 19.5747(6)                                                                                                                                             |
| <i>c</i> , Å                                     | 20.7246(4)                                                                                                 | 15.0048(2)                                                                                           | 21.6622(6)                                                                                                                                             |
| <i>α</i> , deg                                   | 72.6120(10)                                                                                                | 90                                                                                                   | 90                                                                                                                                                     |
| <i>β</i> , deg                                   | 80.9120(10)                                                                                                | 92.5220(10)                                                                                          | 98.734(2)                                                                                                                                              |
| <i>γ</i> , deg                                   | 82.9700(10)                                                                                                | 90                                                                                                   | 90                                                                                                                                                     |
| <i>V</i> , Å <sup>3</sup>                        | 3610.92(10)                                                                                                | 3636.91(9)                                                                                           | 3918.9(2)                                                                                                                                              |
| <i>Z</i>                                         | 4                                                                                                          | 4                                                                                                    | 4                                                                                                                                                      |
| D <sub>calc</sub> (Mg m <sup>-3</sup> )          | 1.992                                                                                                      | 2.400                                                                                                | 2.151                                                                                                                                                  |
| <i>μ</i> (mm <sup>-1</sup> )                     | 8.476                                                                                                      | 9.912                                                                                                | 7.784                                                                                                                                                  |
| T, K                                             | 100(2)                                                                                                     | 200(2)                                                                                               | 200(2)                                                                                                                                                 |
| Cryst dims (mm)                                  | 0.20 × 0.05 × 0.04                                                                                         | 0.17 × 0.10 × 0.04                                                                                   | 0.35 × 0.03 × 0.03                                                                                                                                     |
| Theta range, deg                                 | 2.62-27.00                                                                                                 | 2.72-25.00                                                                                           | 2.82-25.00                                                                                                                                             |
| Reflections collected                            | 74858                                                                                                      | 65911                                                                                                | 9095                                                                                                                                                   |
| unique ( <i>R</i> <sub>int</sub> )               | 15753 (0.0674)                                                                                             | 6407(0.0777)                                                                                         | 6735(0.0305)                                                                                                                                           |
| Data / Restraints / Parameters                   | 15753 / 35 / 864                                                                                           | 6407 / 0 / 451                                                                                       | 6735 / 0 / 532                                                                                                                                         |
| Final R indices [ <i>I</i> > 2σ( <i>I</i> )]     | R1 = 0.0376, wR2 = 0.0841                                                                                  | R1 = 0.0249, wR2 = 0.0631                                                                            | R1 = 0.0423, wR2 = 0.0720                                                                                                                              |
| R indices (all data)                             | R1 = 0.0563, wR2 = 0.0896                                                                                  | R1 = 0.0312, wR2 = 0.0659                                                                            | R1 = 0.0847, wR2 = 0.0807                                                                                                                              |
| Largest diff. peak and hole (e.Å <sup>-3</sup> ) | 2.450, -1.945                                                                                              | 1.394, -1.835                                                                                        | 1.670, -0.960                                                                                                                                          |

| Compound                                         | 16                                                                                                       | 17                                                                                                                                                                                  | 18                                                                                                                                  |
|--------------------------------------------------|----------------------------------------------------------------------------------------------------------|-------------------------------------------------------------------------------------------------------------------------------------------------------------------------------------|-------------------------------------------------------------------------------------------------------------------------------------|
| Formula                                          | [Au <sub>2</sub> (OBz) <sub>2</sub> (μ-2-C <sub>6</sub> F <sub>4</sub> PPh <sub>2</sub> ) <sub>2</sub> ] | [Au <sup>II</sup> <sub>2</sub> (O <sub>2</sub> CCF <sub>3</sub> ) <sub>2</sub> (μ-2-C <sub>6</sub> F <sub>4</sub> PPh <sub>2</sub> ) <sub>2</sub> ].CH <sub>2</sub> Cl <sub>2</sub> | [Au <sub>2</sub> (C <sub>6</sub> F <sub>5</sub> ) <sub>2</sub> (μ-2-C <sub>6</sub> F <sub>4</sub> PPh <sub>2</sub> ) <sub>2</sub> ] |
| fw                                               | 1345.7                                                                                                   | 2648.45                                                                                                                                                                             | 1415.74                                                                                                                             |
| Crystal system                                   | Monoclinic                                                                                               | Triclinic                                                                                                                                                                           | Triclinic                                                                                                                           |
| Space group                                      | P2 <sub>1</sub> /n                                                                                       | P-1                                                                                                                                                                                 | P-1                                                                                                                                 |
| <i>a</i> , Å                                     | 12.14090(10)                                                                                             | 11.17170(10)                                                                                                                                                                        | 11.2743(3)                                                                                                                          |
| <i>b</i> , Å                                     | 15.8124(2)                                                                                               | 19.9849(2)                                                                                                                                                                          | 13.8378(3)                                                                                                                          |
| <i>c</i> , Å                                     | 24.6158(3)                                                                                               | 21.4899(3)                                                                                                                                                                          | 15.6632(3)                                                                                                                          |
| <i>α</i> , deg                                   | 90                                                                                                       | 64.4990(10)                                                                                                                                                                         | 72.6380(10)                                                                                                                         |
| <i>β</i> , deg                                   | 99.8870(10)                                                                                              | 80.8060(10)                                                                                                                                                                         | 72.0350(10)                                                                                                                         |
| <i>γ</i> , deg                                   | 90                                                                                                       | 75.6400(10)                                                                                                                                                                         | 86.0370(10)                                                                                                                         |
| <i>V</i> , Å <sup>3</sup>                        | 4655.48(9)                                                                                               | 4187.51(9)                                                                                                                                                                          | 2217.89(9)                                                                                                                          |
| <i>Z</i>                                         | 4                                                                                                        | 2                                                                                                                                                                                   | 2                                                                                                                                   |
| D <sub>calc</sub> (Mg m <sup>-3</sup> )          | 1.920                                                                                                    | 2.100                                                                                                                                                                               | 2.120                                                                                                                               |
| <i>μ</i> (mm <sup>-1</sup> )                     | 6.444                                                                                                    | 7.236                                                                                                                                                                               | 6.822                                                                                                                               |
| T, K                                             | 110(2)                                                                                                   | 130(2)                                                                                                                                                                              | 100(2)                                                                                                                              |
| Cryst dims (mm)                                  | 0.27 × 0.10 × 0.10                                                                                       | 0.21 × 0.20 × 0.15                                                                                                                                                                  | 0.26 × 0.12 × 0.07                                                                                                                  |
| Theta range, deg                                 | 2.71-36.00                                                                                               | 2.66-27.50                                                                                                                                                                          | 2.70-29.00                                                                                                                          |
| Reflections collected                            | 154997                                                                                                   | 73448                                                                                                                                                                               | 55739                                                                                                                               |
| unique ( <i>R</i> <sub>int</sub> )               | 22018 (0.0754)                                                                                           | 19224(0.0427)                                                                                                                                                                       | 11780 (0.0559)                                                                                                                      |
| Data / Restraints / Parameters                   | 22018 / 0 / 623                                                                                          | 19224 / 157 / 1208                                                                                                                                                                  | 11780 / 136 / 733                                                                                                                   |
| Final R indices [ <i>I</i> > 2σ( <i>I</i> )]     | R1 = 0.0312, wR2 = 0.0557                                                                                | R1 = 0.0337, wR2 = 0.0847                                                                                                                                                           | R1 = 0.0332, wR2 = 0.0770                                                                                                           |
| R indices (all data)                             | R1 = 0.0529, wR2 = 0.0594                                                                                | R1 = 0.0466, wR2 = 0.0906                                                                                                                                                           | R1 = 0.0473, wR2 = 0.0810                                                                                                           |
| Largest diff. peak and hole (e.Å <sup>-3</sup> ) | 2.125, -2.019                                                                                            | 1.596, -1.617                                                                                                                                                                       | 3.005, -1.953                                                                                                                       |

| Compound                                         | 19                                                                                                                                     | 21                                                                                    | 22                                                                                         |
|--------------------------------------------------|----------------------------------------------------------------------------------------------------------------------------------------|---------------------------------------------------------------------------------------|--------------------------------------------------------------------------------------------|
| Formula                                          | [Au <sub>2</sub> <sup>I,III</sup> (CH <sub>3</sub> ) <sub>2</sub> (μ-2-C <sub>6</sub> F <sub>4</sub> PPh <sub>2</sub> ) <sub>2</sub> ] | [Au <sub>4</sub> (μ-2-C <sub>6</sub> F <sub>4</sub> PPh <sub>2</sub> ) <sub>4</sub> ] | [Au <sub>4</sub> (μ-C <sub>6</sub> H <sub>3</sub> -5-F-2-PPh <sub>2</sub> ) <sub>4</sub> ] |
| fw                                               | 1090.46                                                                                                                                | 2412.93                                                                               | 1989.81                                                                                    |
| Crystal system                                   | Triclinic                                                                                                                              | Tetragonal                                                                            | Monoclinic                                                                                 |
| Space group                                      | P-1                                                                                                                                    | P4 <sub>2</sub> /n                                                                    | P2 <sub>1</sub> /c                                                                         |
| <i>a</i> , Å                                     | 11.9272(2)                                                                                                                             | 15.9440(3)                                                                            | 14.2878(2)                                                                                 |
| <i>b</i> , Å                                     | 12.2979(2)                                                                                                                             | 15.9440(3)                                                                            | 16.7228(3)                                                                                 |
| <i>c</i> , Å                                     | 14.2430(2)                                                                                                                             | 14.7921(2)                                                                            | 27.8198(4)                                                                                 |
| α, deg                                           | 71.7130(10)                                                                                                                            | 90                                                                                    | 90                                                                                         |
| β, deg                                           | 66.9410(10)                                                                                                                            | 90                                                                                    | 101.9280(10)                                                                               |
| γ, deg                                           | 64.2670(10)                                                                                                                            | 90                                                                                    | 90                                                                                         |
| <i>V</i> , Å <sup>3</sup>                        | 1705.37                                                                                                                                | 3760.32(11)                                                                           | 6503.52(18)                                                                                |
| <i>Z</i>                                         | 2                                                                                                                                      | 2                                                                                     | 4                                                                                          |
| D <sub>calc</sub> (Mg m <sup>-3</sup> )          | 2.124                                                                                                                                  | 2.131                                                                                 | 2.032                                                                                      |
| μ (mm <sup>-1</sup> )                            | 8.759                                                                                                                                  | 8.192                                                                                 | 9.230                                                                                      |
| T, K                                             | 110(2)                                                                                                                                 | 110(2)                                                                                | 100(2)                                                                                     |
| Cryst dimens (mm)                                | 0.29 × 0.14 × 0.09                                                                                                                     | 0.17 × 0.15 × 0.09                                                                    | 0.13 × 0.11 × 0.05                                                                         |
| Theta range, deg                                 | 2.65-35.00                                                                                                                             | 2.90-35.00                                                                            | 2.55-28.00                                                                                 |
| Reflections collected                            | 66388                                                                                                                                  | 41538                                                                                 | 80637                                                                                      |
| unique (R <sub>int</sub> )                       | 14975 (0.0732)                                                                                                                         | 8284 (0.0415)                                                                         | 15654 (0.0746)                                                                             |
| Data / Restraints / Parameters                   | 14975 / 0 / 451                                                                                                                        | 8284 / 25 / 283                                                                       | 15654 / 33 / 805                                                                           |
| Final R indices [ <i>I</i> > 2σ( <i>I</i> )]     | R1 = 0.0363, wR2 = 0.0897                                                                                                              | R1 = 0.0318, wR2 = 0.0722                                                             | R1 = 0.0355, wR2 = 0.0674                                                                  |
| R indices (all data)                             | R1 = 0.0468, wR2 = 0.0936                                                                                                              | R1 = 0.0527, wR2 = 0.0774                                                             | R1 = 0.0606, wR2 = 0.0731                                                                  |
| Largest diff. peak and hole (e.Å <sup>-3</sup> ) | 5.705, -3.880                                                                                                                          | 1.689, -1.669                                                                         | 1.505, -1.756                                                                              |

| Compound                                         | 24                                                                                                                                                         | 28                                                                                                                                             | 32                                                                                                                                                |
|--------------------------------------------------|------------------------------------------------------------------------------------------------------------------------------------------------------------|------------------------------------------------------------------------------------------------------------------------------------------------|---------------------------------------------------------------------------------------------------------------------------------------------------|
| Formula                                          | [{Au <sub>2</sub> Br(μ-C <sub>6</sub> H <sub>3</sub> -6-F-2-PPh <sub>2</sub> ) <sub>2</sub> }(C <sub>6</sub> H <sub>3</sub> -6-F-2-PPh <sub>2</sub> )AuBr] | [ClAu(μ-2-C <sub>6</sub> H <sub>3</sub> -6-F-2-PPh <sub>2</sub> )(κ <sup>2</sup> -C <sub>6</sub> H <sub>3</sub> -6-F-2-PPh <sub>2</sub> )AuCl] | [Au <sub>2</sub> Cl <sub>2</sub> (2,2'-Ph <sub>2</sub> P-5-F-C <sub>6</sub> H <sub>3</sub> C <sub>6</sub> H <sub>3</sub> -5-F-PPh <sub>2</sub> )] |
| fw                                               | 1793.98                                                                                                                                                    | 1108.27                                                                                                                                        | 1023.34                                                                                                                                           |
| Crystal system                                   | Monoclinic                                                                                                                                                 | Triclinic                                                                                                                                      | Monoclinic                                                                                                                                        |
| Space group                                      | P2 <sub>1</sub> /n                                                                                                                                         | P-1                                                                                                                                            | P2 <sub>1</sub> /c                                                                                                                                |
| <i>a</i> , Å                                     | 19.0219(3)                                                                                                                                                 | 8.84910(10)                                                                                                                                    | 11.01700(10)                                                                                                                                      |
| <i>b</i> , Å                                     | 11.9992(2)                                                                                                                                                 | 11.4657(2)                                                                                                                                     | 15.97300(10)                                                                                                                                      |
| <i>c</i> , Å                                     | 26.0829(4)                                                                                                                                                 | 18.1948(3)                                                                                                                                     | 18.1351(2)                                                                                                                                        |
| α, deg                                           | 90                                                                                                                                                         | 87.2030(10)                                                                                                                                    | 90                                                                                                                                                |
| β, deg                                           | 103.3430(10)                                                                                                                                               | 77.6010(10)                                                                                                                                    | 90.4610(10)                                                                                                                                       |
| γ, deg                                           | 90                                                                                                                                                         | 86.2500(10)                                                                                                                                    | 90                                                                                                                                                |
| <i>V</i> , Å <sup>3</sup>                        | 5792.65(16)                                                                                                                                                | 1798.00                                                                                                                                        | 3191.21(5)                                                                                                                                        |
| <i>Z</i>                                         | 4                                                                                                                                                          | 2                                                                                                                                              | 4                                                                                                                                                 |
| D <sub>calc</sub> (Mg m <sup>-3</sup> )          | 2.057                                                                                                                                                      | 2.047                                                                                                                                          | 2.130                                                                                                                                             |
| μ (mm <sup>-1</sup> )                            | 9.229                                                                                                                                                      | 8.574                                                                                                                                          | 9.490                                                                                                                                             |
| T, K                                             | 100(2)                                                                                                                                                     | 100(2)                                                                                                                                         | 100(2)                                                                                                                                            |
| Cryst dimens (mm)                                | 0.25 × 0.17 × 0.07                                                                                                                                         | 0.41 × 0.12 × 0.05                                                                                                                             | 0.30 × 0.25 × 0.22                                                                                                                                |
| Theta range, deg                                 | 2.75-29.00                                                                                                                                                 | 2.83-35.00                                                                                                                                     | 2.79-35.00                                                                                                                                        |
| Reflections collected                            | 67386                                                                                                                                                      | 67525                                                                                                                                          | 76037                                                                                                                                             |
| unique (R <sub>int</sub> )                       | 15370 (0.0697)                                                                                                                                             | 15839 (0.0700)                                                                                                                                 | 14036 (0.0554)                                                                                                                                    |
| Data / Restraints / Parameters                   | 15370 / 61 / 715                                                                                                                                           | 15839 / 27 / 434                                                                                                                               | 14036 / 0 / 397                                                                                                                                   |
| Final R indices [ <i>I</i> > 2σ( <i>I</i> )]     | R1 = 0.0413, wR2 = 0.1017                                                                                                                                  | R1 = 0.0340, wR2 = 0.0827                                                                                                                      | R1 = 0.0266, wR2 = 0.0576                                                                                                                         |
| R indices (all data)                             | R1 = 0.0592, wR2 = 0.1079                                                                                                                                  | R1 = 0.0447, wR2 = 0.0864                                                                                                                      | R1 = 0.0367, wR2 = 0.0599                                                                                                                         |
| Largest diff. peak and hole (e.Å <sup>-3</sup> ) | 3.753, -3.555                                                                                                                                              | 4.081, -3.527                                                                                                                                  | 2.100, -1.949                                                                                                                                     |

| Compound                                         | 33                                                                                                                                                | 35                                                                                                                                   | 36                                                                                                                                                                   |
|--------------------------------------------------|---------------------------------------------------------------------------------------------------------------------------------------------------|--------------------------------------------------------------------------------------------------------------------------------------|----------------------------------------------------------------------------------------------------------------------------------------------------------------------|
| Formula                                          | [Au <sub>2</sub> Br <sub>2</sub> (2,2'-Ph <sub>2</sub> P-5-F-C <sub>6</sub> H <sub>3</sub> C <sub>6</sub> H <sub>3</sub> -5-F-PPh <sub>2</sub> )] | [OAcAu(μ-2-C <sub>6</sub> F <sub>4</sub> PPh <sub>2</sub> )(κ <sup>2</sup> -2-C <sub>6</sub> F <sub>4</sub> PPh <sub>2</sub> )AuOAc] | [(O <sub>2</sub> NO)Au(μ-2-C <sub>6</sub> F <sub>4</sub> PPh <sub>2</sub> )(κ <sup>2</sup> -2-C <sub>6</sub> F <sub>4</sub> PPh <sub>2</sub> )Au(ONO <sub>2</sub> )] |
| fw                                               | 1112.26                                                                                                                                           | 1189.65                                                                                                                              | 1184.41                                                                                                                                                              |
| Crystal system                                   | Monoclinic                                                                                                                                        | Triclinic                                                                                                                            | Monoclinic                                                                                                                                                           |
| Space group                                      | P2 <sub>1</sub> /c                                                                                                                                | P-1                                                                                                                                  | P2 <sub>1</sub> /c                                                                                                                                                   |
| <i>a</i> , Å                                     | 11.03440(10)                                                                                                                                      | 10.0844(3)                                                                                                                           | 10.1875(3)                                                                                                                                                           |
| <i>b</i> , Å                                     | 16.0528(2)                                                                                                                                        | 11.2569(3)                                                                                                                           | 34.2523(12)                                                                                                                                                          |
| <i>c</i> , Å                                     | 18.4780(2)                                                                                                                                        | 18.2943(5)                                                                                                                           | 10.5338(3)                                                                                                                                                           |
| α, deg                                           | 90                                                                                                                                                | 92.311(2)                                                                                                                            | 90                                                                                                                                                                   |
| β, deg                                           | 91.6760(10)                                                                                                                                       | 96.760(2)                                                                                                                            | 90.854(2)                                                                                                                                                            |
| γ, deg                                           | 90                                                                                                                                                | 114.716(2)                                                                                                                           | 90                                                                                                                                                                   |
| <i>V</i> , Å <sup>3</sup>                        | 3271.66(6)                                                                                                                                        | 1864.14(10)                                                                                                                          | 3675.3(2)                                                                                                                                                            |
| <i>Z</i>                                         | 4                                                                                                                                                 | 2                                                                                                                                    | 4                                                                                                                                                                    |
| D <sub>calc</sub> (Mg m <sup>-3</sup> )          | 2.258                                                                                                                                             | 2.119                                                                                                                                | 2.141                                                                                                                                                                |
| μ (mm <sup>-1</sup> )                            | 11.536                                                                                                                                            | 8.032                                                                                                                                | 8.151                                                                                                                                                                |
| T, K                                             | 100(2)                                                                                                                                            | 110(2)                                                                                                                               | 110(2)                                                                                                                                                               |
| Cryst dimens (mm)                                | 0.37 × 0.25 × 0.19                                                                                                                                | 0.12 × 0.07 × 0.04                                                                                                                   | 0.21 × 0.19 × 0.10                                                                                                                                                   |
| Theta range, deg                                 | 2.83-35.00                                                                                                                                        | 2.86-28.50                                                                                                                           | 2.68-27.36                                                                                                                                                           |
| Reflections collected                            | 70789                                                                                                                                             | 49598                                                                                                                                | 29664                                                                                                                                                                |
| unique (R <sub>int</sub> )                       | 14374(0.0748)                                                                                                                                     | 9396(0.0861)                                                                                                                         | 8226 (0.0790)                                                                                                                                                        |
| Data / Restraints / Parameters                   | 14374 / 0 / 397                                                                                                                                   | 9396 / 55 / 559                                                                                                                      | 8226 / 0 / 505                                                                                                                                                       |
| Final R indices [ <i>I</i> > 2σ( <i>I</i> )]     | R1 = 0.0318, wR2 = 0.0721                                                                                                                         | R1 = 0.0379, wR2 = 0.0711                                                                                                            | R1 = 0.0530, wR2 = 0.1288                                                                                                                                            |
| R indices (all data)                             | R1 = 0.0454, wR2 = 0.0756                                                                                                                         | R1 = 0.0754, wR2 = 0.0786                                                                                                            | R1 = 0.0716, wR2 = 0.1368                                                                                                                                            |
| Largest diff. peak and hole (e.Å <sup>-3</sup> ) | 2.685, -2.383                                                                                                                                     | 2.017, -1.579                                                                                                                        | 3.913, -2.628                                                                                                                                                        |

| Compound                                         | 41                                                                                                                                               | 42                                                                                                                                               |
|--------------------------------------------------|--------------------------------------------------------------------------------------------------------------------------------------------------|--------------------------------------------------------------------------------------------------------------------------------------------------|
| Formula                                          | [Cl <sub>3</sub> Au(μ-2-C <sub>6</sub> F <sub>4</sub> PPh <sub>2</sub> )(κ <sup>2</sup> -2-C <sub>6</sub> F <sub>4</sub> PPh <sub>2</sub> )AuCl] | [Br <sub>3</sub> Au(μ-2-C <sub>6</sub> F <sub>4</sub> PPh <sub>2</sub> )AuBr(κ <sup>2</sup> -2-C <sub>6</sub> F <sub>4</sub> PPh <sub>2</sub> )] |
| fw                                               | 1287.12                                                                                                                                          | 1464.96                                                                                                                                          |
| Crystal system                                   | Triclinic                                                                                                                                        | Triclinic                                                                                                                                        |
| Space group                                      | P-1                                                                                                                                              | P-1                                                                                                                                              |
| <i>a</i> , Å                                     | 10.7369(2)                                                                                                                                       | 10.9022(3)                                                                                                                                       |
| <i>b</i> , Å                                     | 14.4038(2)                                                                                                                                       | 14.5683(4)                                                                                                                                       |
| <i>c</i> , Å                                     | 14.5209(2)                                                                                                                                       | 14.5702(4)                                                                                                                                       |
| α, deg                                           | 60.9030(10)                                                                                                                                      | 119.3830(10)                                                                                                                                     |
| β, deg                                           | 82.7430(10)                                                                                                                                      | 94.2110(10)                                                                                                                                      |
| γ, deg                                           | 88.0100(10)                                                                                                                                      | 92.7670(10)                                                                                                                                      |
| <i>V</i> , Å <sup>3</sup>                        | 1945.64(6)                                                                                                                                       | 2001.51(10)                                                                                                                                      |
| <i>Z</i>                                         | 2                                                                                                                                                | 2                                                                                                                                                |
| D <sub>calc</sub> (Mg m <sup>-3</sup> )          | 2.197                                                                                                                                            | 2.431                                                                                                                                            |
| μ (mm <sup>-1</sup> )                            | 8.094                                                                                                                                            | 11.594                                                                                                                                           |
| T, K                                             | 100(2)                                                                                                                                           | 100(2)                                                                                                                                           |
| Cryst dimens (mm)                                | 0.29 × 0.20 × 0.12                                                                                                                               | 0.22 × 0.18 × 0.10                                                                                                                               |
| Theta range, deg                                 | 2.63-38.00                                                                                                                                       | 2.59-33.00                                                                                                                                       |
| Reflections collected                            | 80292                                                                                                                                            | 50246                                                                                                                                            |
| unique (R <sub>int</sub> )                       | 21176 (0.0631)                                                                                                                                   | 15094(0.0611)                                                                                                                                    |
| Data / Restraints / Parameters                   | 21176 / 0 / 496                                                                                                                                  | 15094 / 0 / 497                                                                                                                                  |
| Final R indices [ <i>I</i> > 2σ( <i>I</i> )]     | R1 = 0.0338, wR2 = 0.0838                                                                                                                        | R1 = 0.0493, wR2 = 0.1151                                                                                                                        |
| R indices (all data)                             | R1 = 0.0419, wR2 = 0.0868                                                                                                                        | R1 = 0.0560, wR2 = 0.1174                                                                                                                        |
| Largest diff. peak and hole (e.Å <sup>-3</sup> ) | 5.374, -5.879                                                                                                                                    | 5.481, -2.992                                                                                                                                    |

## Syntheses:

### (2-Trimethylstannyltetrafluorophenyl)diphenylphosphine).

A solution of 2-BrC<sub>6</sub>F<sub>4</sub>PPh<sub>2</sub> (16 mmol, 6.6 g) in ether (100 mL) was cooled to -78 °C and treated slowly with a solution of <sup>n</sup>BuLi (1.6 M in hexanes, 16 mmol, 10.0 mL). After stirring for 30 min, Me<sub>3</sub>SnCl (1.0 M in hexanes, 16 mmol, 16.0 mL) was added dropwise to the solution, which was stirred at -78 °C for 2 hours. After being allowed to warm to room temperature, the suspension was hydrolysed and the ether layer separated. The aqueous phase was extracted with ether (3 × 50 mL) and the combined organic phases were dried (MgSO<sub>4</sub>). After filtration, the solvent was removed and the gummy solid was recrystallised from hot methanol to give white crystals of the title compound (6.9 g, 87%).

m.p: 77-79 °C. <sup>1</sup>H NMR (CDCl<sub>3</sub>): δ 0.50 (s, with <sup>117</sup>Sn/<sup>119</sup>Sn satellites *J* = 56.5 Hz, 9H, SnMe<sub>3</sub>), 7.2-7.4 (m, 10H, aromatics). <sup>13</sup>C NMR (CDCl<sub>3</sub>): δ -3.9 (dd, *J* = 4.5, 13.3 Hz with <sup>117</sup>Sn/<sup>119</sup>Sn satellites *J* = 369.5 Hz) together with 128.5 (d, *J* = 6.4 Hz), 128.8 (s), 132.4 (dd, *J* = 1.8, 18.9 Hz), 134.6 (dd, *J* = 2.2, 9.2 Hz) due to the PPh<sub>2</sub> carbons and low intensity peaks at δ 125.5 (m), 140.7 (m), 141.5 (m), 148.7 (m), 150.1 (m), 150.7 (m) due to the C<sub>6</sub>F<sub>4</sub> carbons. <sup>31</sup>P NMR (CDCl<sub>3</sub>): δ -0.2 (ddd, *J*<sub>PF</sub> = 1.6, 2.9, 22.8 Hz with <sup>117</sup>Sn/<sup>119</sup>Sn satellites *J* = 29.4 Hz). <sup>19</sup>F NMR (CDCl<sub>3</sub>): δ -119.1 (m), -120.4 (m), -151.3 (m), -153.2 (m). ESI-MS (*m/z*): 499 [*M*+H]<sup>+</sup>. Anal. Calcd. for C<sub>21</sub>H<sub>19</sub>F<sub>4</sub>PSn: C 50.75, H 3.85, F 15.29. Found: C 51.04, H 3.96, F 15.32.

### (2-Bromo-*n*-fluorophenyl)diphenylphosphine (*n* = 3, 4).

To a solution of 2-bromo-3-fluoriodobenzene (16.1 mmol, 4.9 g) and [PdCl<sub>2</sub>(NCMe)<sub>2</sub>] (0.4 mmol, 0.1 g) in dry toluene (20 mL) was added (trimethylsilyl)diphenylphosphine (17.5 mmol, 4.5 g). The resulting dark solution was stirred at 85 °C for 3 days and then allowed to cool to room temperature. Dichloromethane was added and the solution was washed with saturated aqueous NaHCO<sub>3</sub>. The organic layer was separated and the aqueous layer was extracted with CH<sub>2</sub>Cl<sub>2</sub> (3 × 50 mL). The combined organic extracts were dried over MgSO<sub>4</sub> and filtered: the solvents were evaporated to give an orange semi-solid. The crude product was passed down a silica-gel column, eluting with toluene/hexane (1:1) to give (2-bromo-3-fluorophenyl)diphenylphosphine as a colourless oil, which was crystallised from hot methanol to afford the title product as a white solid (3.8 g, 66%).

m.p: 139-141 °C.  $^1\text{H}$  NMR ( $\text{CDCl}_3$ ):  $\delta$  6.50 (m, 1H, aromatic), 7.12 (m, 2H, aromatics), 7.2-7.6 (m, 10H, aromatics).  $^{13}\text{C}$  NMR ( $\text{CDCl}_3$ ):  $\delta$  116.0 (dd,  $J_{\text{FC}} = 20.3$  Hz,  $J_{\text{PC}} = 31.1$  Hz), 116.3 (d,  $J_{\text{FC}} = 22.9$ ), 128.4 (d,  $J_{\text{PC}} = 7.5$  Hz), 128.7 (d,  $J_{\text{PC}} = 7.4$  Hz), 129.2 (s), 129.6 (dd,  $J_{\text{FC}} = 1.5$  Hz,  $J_{\text{PC}} = 3.3$  Hz), 134.0 (d,  $J_{\text{PC}} = 20.5$  Hz), 135.3 (d,  $J_{\text{PC}} = 10.5$  Hz), 141.0 (dd,  $J_{\text{FC}} = 1.1$  Hz,  $J_{\text{PC}} = 14.3$  Hz), 159.1 (dd,  $J_{\text{FC}} = 249$  Hz,  $J_{\text{PC}} = 5.4$  Hz).  $^{31}\text{P}$  NMR ( $\text{CDCl}_3$ ):  $\delta$  -4.5 (d,  $J_{\text{PF}} = 9.4$  Hz).  $^{19}\text{F}$  NMR ( $\text{CDCl}_3$ ):  $\delta$  -105.4 (m). ESI-MS ( $m/z$ ): 359  $[M+H]^+$ . Anal. Calcd. for  $\text{C}_{18}\text{H}_{13}\text{BrFP}$ : C 60.19, H 3.65, Br 22.25, P 8.62. Found: C 60.18, H 3.82, Br 22.04, P 8.47.

(2-Bromo-4-fluorophenyl)diphenylphosphine was prepared similarly to (2-bromo-3-fluorophenyl)diphenylphosphine and obtained as a colourless solid in 81% yield from 2-bromo-4-fluoroiodobenzene (50.8 mmol, 15.3 g),  $[\text{PdCl}_2(\text{NCMe})_2]$  (0.98 mmol, 0.25 g) and (trimethylsilyl)diphenylphosphine (53.8 mmol, 13.9 g).

m.p: 86-88 °C.  $^1\text{H}$  NMR ( $\text{CDCl}_3$ ):  $\delta$  6.75 (ddd,  $J_{\text{HH}} = 8.6$  Hz,  $J_{\text{FH}} = 6.4$  Hz,  $J_{\text{PH}} = 2.2$  Hz, 1H, aromatic), 6.96 (dt,  $J_{\text{HH}} = 2.4, 8.4$  Hz,  $J_{\text{FH}} = 8.4$  Hz, 1H, aromatic), 7.2-7.5 (m, 11H, aromatics).  $^{13}\text{C}$  NMR ( $\text{CDCl}_3$ ):  $\delta$  114.9 (d,  $J = 20.2$  Hz), 120.4 (d,  $J = 24.2$  Hz), 128.7 (d,  $J_{\text{PC}} = 7.3$  Hz), 129.1 (s), 129.9 (dd,  $J = 9.1, 33.2$  Hz), 133.8 (d,  $J_{\text{PC}} = 29.5$  Hz), 134.4 (dd,  $J = 4.1, 12.2$  Hz), 135.6 (d,  $J_{\text{PC}} = 2.6$  Hz), 135.7 (s), 162.7 (d,  $J = 253$  Hz).  $^{31}\text{P}$  NMR ( $\text{CDCl}_3$ ):  $\delta$  -5.8 (d,  $J_{\text{PF}} = 3.7$  Hz).  $^{19}\text{F}$  NMR ( $\text{CDCl}_3$ ):  $\delta$  -111.5 (ddt,  $J_{\text{PF}} = 3.1$  Hz,  $J_{\text{FH}} = 6.3, 8.2$  Hz). ESI-MS ( $m/z$ ): 359  $[M+H]^+$ . Anal. Calcd. for  $\text{C}_{18}\text{H}_{13}\text{BrFP}$ : C 60.19, H 3.65, Br 22.25, P 8.62. Found: C 60.52, H 3.79, Br 21.96, P 8.65.

### **(2-Trimethylstannyl-*n*-fluorophenyl)diphenylphosphine ( $n = 3, 4$ ).**

To a solution of (2-bromo-3-fluorophenyl)diphenylphosphine (2.6 mmol, 0.9 g) in ether (50 mL) cooled to -78 °C was added  $n\text{BuLi}$  (1.6 M in hexanes, 2.6 mmol, 1.6 mL). The suspension was stirred for 30 min and then  $\text{Me}_3\text{SnCl}$  (1.0 M in hexanes, 2.6 mmol, 2.6 mL) was slowly added. The mixture was stirred at -78 °C for 2 hours and then allowed to warm to room temperature. The resulting suspension was hydrolysed, the organic layer was separated and the aqueous phase was extracted with ether ( $3 \times 50$  mL). The combined organic extracts were dried over  $\text{MgSO}_4$ , filtered, and the solvent was evaporated to give a gummy solid which was crystallised from hot methanol to give (2-trimethylstannyl-3-fluorophenyl)diphenylphosphine as a white solid (0.77 g, 68%).

m.p: 58-60 °C.  $^1\text{H}$  NMR ( $\text{CDCl}_3$ ):  $\delta$  0.48 (t,  $J_{\text{PH}} = J_{\text{FH}} = 1.4$  Hz with  $^{117}\text{Sn}/^{119}\text{Sn}$  satellites  $J = 54.2, 56.5$  Hz, 9H,  $\text{SnMe}_3$ ), 6.6-7.4 (m, 13H, aromatics).  $^{13}\text{C}$  NMR ( $\text{CDCl}_3$ ):  $\delta$  -4.7 (dd,  $J = 4.1, 11.2$  Hz with  $^{117}\text{Sn}/^{119}\text{Sn}$  satellites  $J = 349.9, 366.1$  Hz), 115.1 (d,  $J_{\text{FC}} = 25.3$  Hz, with  $^{117}\text{Sn}/^{119}\text{Sn}$  satellites  $J = 16.2$  Hz), 128.8 (d,  $J_{\text{PC}} = 5.0$  Hz), 128.9 (s), 129.0 (d,  $J_{\text{PC}} = 2.9$  Hz with  $^{117}\text{Sn}/^{119}\text{Sn}$  satellites  $J = 34.4$  Hz), 131.0 (d,  $J_{\text{PC}} = 9.2$  Hz), 133.5 (d,  $J_{\text{PC}} = 18.6$  Hz), 136.9 (dd,  $J_{\text{PC}/\text{FC}} = 40.7, 62.1$  Hz), 138.0 (d,  $J_{\text{PC}} = 25.3$



Hz with  $^{117}\text{Sn}/^{119}\text{Sn}$  satellites  $J = 16.2$  Hz), 148.0 (dd,  $J_{\text{PC/FC}} = 6.1, 11.1$  Hz with  $^{117}\text{Sn}/^{119}\text{Sn}$  satellites  $J = 22.9$  Hz), 167.9 (dd,  $J_{\text{FC}} = 237.7$  Hz,  $J_{\text{PC}} = 22.8$  Hz).  $^{31}\text{P}$  NMR ( $\text{CDCl}_3$ ):  $\delta$  -2.5 (d,  $J_{\text{PF}} = 1.6$  Hz with  $^{117}\text{Sn}/^{119}\text{Sn}$  satellites  $J = 37.9, 40.6$  Hz).  $^{19}\text{F}$  NMR ( $\text{CDCl}_3$ ):  $\delta$  -91.4 (br s, with  $^{117}\text{Sn}/^{119}\text{Sn}$  satellites  $J = 60.4$  Hz). ESI-MS ( $m/z$ ): 445  $[\text{M}+\text{H}]^+$ . Anal. Calcd. for  $\text{C}_{21}\text{H}_{22}\text{FPSn}$ : C 56.93, H 5.00, F 4.29, P 6.99. Found: C 57.01, H 5.03, F 4.15, P 6.87.

(2-Trimethylstannyl-4-fluorophenyl)diphenylphosphine was made analogously to (2-trimethylstannyl-3-fluorophenyl)diphenylphosphine on the same scale in 85% yield.

m.p: 77-79 °C.  $^1\text{H}$  NMR:  $\delta$  0.32 (d,  $J = 1.2$  Hz, with  $^{117}\text{Sn}/^{119}\text{Sn}$  satellites  $J = 53.1, 55.4$  Hz, 9H,  $\text{SnMe}_3$ ), 6.6-7.5 (m, 13H, aromatics).  $^{13}\text{C}$  NMR:  $\delta$  -6.1 (d,  $J = 10.3$  Hz with  $^{117}\text{Sn}/^{119}\text{Sn}$  satellites  $J = 331.7, 352.2$  Hz), 116.4 (d,  $J = 22.5$  Hz), 122.8 (dd,  $J = 17.5, 21.5$  Hz with  $^{117}\text{Sn}/^{119}\text{Sn}$  satellites  $J = 45.5, 79.7$  Hz), 128.7 (d,  $J = 3.2$  Hz), 128.9 (s), 133.5 (d,  $J = 18.4$  Hz), 136.7 (d,  $J = 6.2$  Hz with  $^{117}\text{Sn}/^{119}\text{Sn}$  satellites  $J = 38.9, 51.3$  Hz), 138.3 (d,  $J = 10.2$  Hz), 140.4 (t,  $J = 2.0$  Hz, with  $^{117}\text{Sn}/^{119}\text{Sn}$  satellites  $J = 34.73, 41.1$  Hz), 156.6 (dd,  $J = 2.9, 70.7$  Hz), 163.7 (d,  $J = 253.9$  Hz).  $^{31}\text{P}$  NMR:  $\delta$  -4.2 (d,  $J_{\text{PF}} = 5.8$  Hz with  $^{117}\text{Sn}/^{119}\text{Sn}$  satellites  $J = 30.1, 41.6$  Hz).  $^{19}\text{F}$  NMR ( $\text{CDCl}_3$ ):  $\delta$  -112.6 (t,  $J = 6.59$  Hz), ESI-MS ( $m/z$ ): 445  $[\text{M}+\text{H}]^+$ . Anal. Calcd. for  $\text{C}_{21}\text{H}_{22}\text{FPSn}$ : C 56.93, H 5.00, F 4.29, P 6.99. Found: C 56.16, H 5.24, F 3.97, P 6.31.

### 5-Fluoro-substituted digold(I) complex $[\text{Au}_2(\mu\text{-C}_6\text{H}_3\text{-5-F-2-PPh}_2)_2]$ **3**.

A solution of 2-Br-4-FC<sub>6</sub>H<sub>3</sub>PPh<sub>2</sub> (1.6 mmol, 0.6 g) in ether (20 mL) was cooled to -78 °C and  $n\text{BuLi}$  (1.6 M in hexanes, 1.6 mmol, 1.0 mL) was added slowly. The mixture was stirred for 30 min and a suspension of  $[\text{AuBr}(\text{AsPh}_3)]$  (1.6 mmol, 0.97 g) in ether (20 mL) was added via cannula. The resulting mixture was stirred at -78 °C for 2 hours and then allowed to warm to room temperature overnight. The white solid was isolated by filtration and washed successively with ether (10 mL), methanol (10 mL) and hexane (20 mL). The crude product was extracted with hot dichloromethane and the extract was filtered through Celite. Evaporation of the solution gave  $[\text{Au}_2(\mu\text{-C}_6\text{H}_3\text{-5-F-2-PPh}_2)_2]$  as a colourless solid (0.88 g, 55%).

$^1\text{H}$  NMR:  $\delta$  6.7-8.1 (m, 26H, aromatics). ESI-MS ( $m/z$ ): 953  $[\text{M}+\text{H}]^+$ .

Alternatively, an analogous reaction to that for the preparation of the digold(I) complex  $[\text{Au}_2(\mu\text{-C}_6\text{H}_3\text{-6-F-2-PPh}_2)_2]$ , using 2-Me<sub>3</sub>Sn-4-FC<sub>6</sub>H<sub>3</sub>PPh<sub>2</sub> (2.3 mmol, 1.0 g) and  $[\text{AuCl}(\text{tht})]$  (2.3 mmol, 0.7 g), gave a mixture of the dinuclear complex  $[\text{Au}_2(\mu\text{-C}_6\text{H}_3\text{-5-F-2-PPh}_2)_2]$  and tetranuclear complex  $[\text{Au}_4(\mu\text{-C}_6\text{H}_3\text{-5-F-2-PPh}_2)_4]$ . The  $^{31}\text{P}$  NMR spectrum of this solid showed two triplet resonances at  $\delta$  40.6 (t,  $J = 6.0$  Hz) and 36.1 (t,  $J = 5.2$  Hz). The former was always the major peak (*ca.* 70%) and is assigned to the tetramer.

ESI-mass spectrum of this mixture showed expected the  $[M+H]^+$  ion peaks due to the dimer and tetramer at  $m/z$  953 and 1905, respectively.

#### **6-Fluoro-substituted digold(I) complex $[\text{Au}_2(\mu\text{-C}_6\text{H}_3\text{-6-F-2-PPh}_2)_2]$ **4**.**

To a solution of 2-Me<sub>3</sub>Sn-3-FC<sub>6</sub>H<sub>3</sub>PPh<sub>2</sub> (2.26 mmol, 1.0 g) in dichloromethane (40 mL) was added [AuCl(tht)] (2.26 mmol, 0.72 g) and the mixture was refluxed for 24 hours. The volume was reduced and hexane added to precipitate the title complex as a white solid which was isolated by filtration, washed with hexane and dried *in vacuo* (1.6 g, 75%).

<sup>1</sup>H NMR:  $\delta$  6.9-7.6 (m, 26H, aromatics). ESI-MS ( $m/z$ ): 953  $[M+H]^+$ .

Alternatively, an analogous reaction to that for the preparation of the digold(I) complex  $[\text{Au}_2(\mu\text{-2-C}_6\text{F}_4\text{PPh}_2)_2]$  (**1**), using 2-Br-3-FC<sub>6</sub>H<sub>3</sub>PPh<sub>2</sub> (2.8 mmol, 1.0 g), <sup>n</sup>BuLi (1.6 M in hexanes, 2.8 mmol, 1.7 mL) and [AuBr(AsPh<sub>3</sub>)] (2.8 mmol, 1.6 g), gave a mixture of the dinuclear complex  $[\text{Au}_2(\mu\text{-C}_6\text{H}_3\text{-6-F-2-PPh}_2)_2]$  and tetranuclear species  $[\text{Au}_4(\mu\text{-C}_6\text{H}_3\text{-6-F-2-PPh}_2)_4]$  in 78% yield. The <sup>31</sup>P NMR spectrum of this solid showed a doublet of doublets at  $\delta$  39.0 ( $J = 1.2, 2.4$  Hz) due to the dimer and a doublet of multiplets at  $\delta$  41.1 ( $J = ca. 5$  Hz) due to the tetramer; the former peak was always more intense (*ca.* 70%). The ESI-mass spectrum of this mixture showed the expected  $[M+H]^+$  ion peaks due to the dimer and tetramer at  $m/z$  953 and 1905, respectively.
